# Supplementary material for: Implementation of state-of-the-art ternary new particle formation scheme to the regional chemical transport model PMCAMx-UF in Europe
Source: Copernicus journal article supplement (doi:10.5194/gmd-2016-21), 2016-02-11
Supplement: Supplementary file 1 [file gmd-2016-21-supplement.pdf]

## Supplementary Information

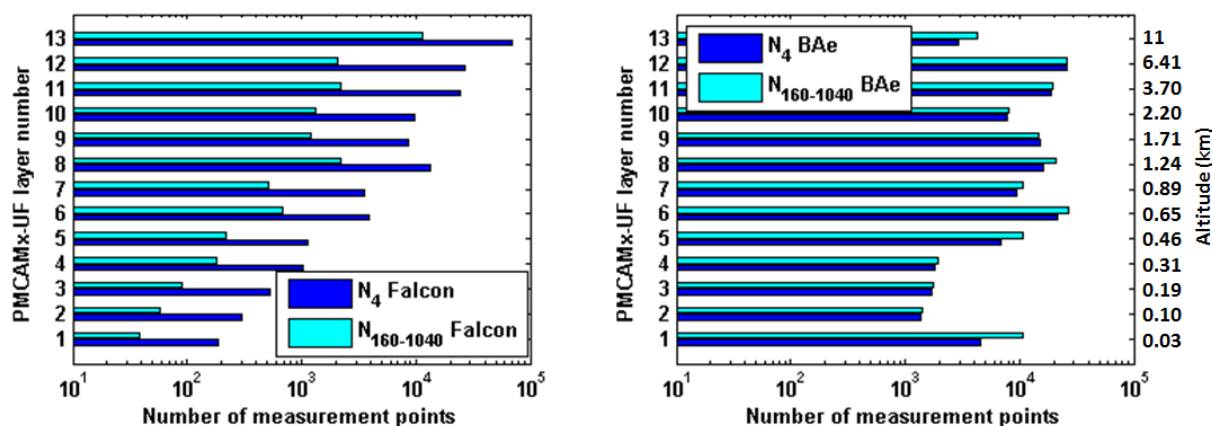

Figure S1. The availability of particle number concentration measurements as data point counts (x-axis) in the different model layers for particles larger than 4 nm ( $N_4$ ) and particles with sizes between 160 and 1040 nm ( $N_{160-1040}$ ) measured by the German DLR Falcon 20 (left panel) and the British FAAM BAe 146 (right panel) aircrafts. The corresponding altitude of the layer midpoint is shown on the right-hand side of the y-axis of the right panel. Note that similarly to  $N_4$ , the  $N_{10}$  has been measured by the same instrument onboard the Falcon 20 which results in the same data availability as  $N_4$ .

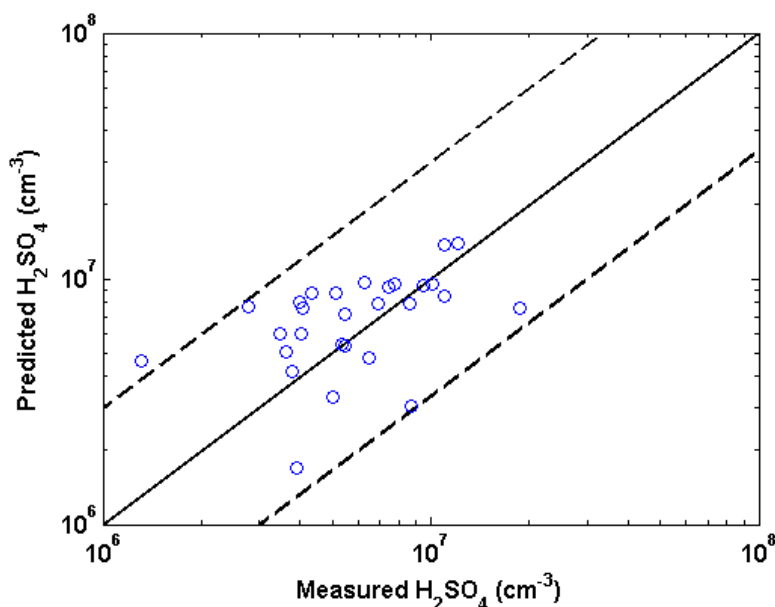

Figure S2. Comparison of PMCAMx-UF predictions vs. measurements of daily-averaged gas phase concentration ( $\text{cm}^{-3}$ ) of sulfuric acid ( $\text{H}_2\text{SO}_4$ ) during May 2008 for the site Melpitz, Germany. Lines corresponding to 1:1 (solid line), and 1:3 and 3:1 (dashed lines) are shown.
